# Supplementary material for: Efficacy and Safety of the Dipeptidyl Peptidase-4 Inhibitor Alogliptin in Patients With Type 2 Diabetes and Inadequate Glycemic Control: A randomized, double-blind, placebo-controlled study
Source: PubMed Central journal article supplement — Diabetes Care. 2008 Dec;31(12):2315–7. doi: 10.2337/dc08-1035 (PMC2584188; doi:10.2337/dc08-1035), 2008-12
Supplement: dc08-1035_1.pdf [file dc08-1035_1.pdf]

## Online-Only Appendix

### Study Investigators:

*Argentina* – Castano P, Cuadrado J, Maffei L; *Australia* – Colagiuri S, dEmden M, Gilfillan C, Phillips P; *Brazil* – Chrisman C, Dinato M, Forti A, Hayashida C, Neto J, Rea R; *Chile* – Gonzalez F; *Dominican Republic* – Luna-Sevez F; *Guatemala* – Nitsch-Montiel M, Sanchez-Morales F; *Hungary* – Foldesi I, Futo L; *India* – Chowdhury S, Prasanna Kumar K, Rais N, Viswanathan M, Viswanathan V; *Mexico* – Dueñas-Garcia C, Sauque-Reyna L; *Netherlands* – AlHakim M, Deijl A; *New Zealand* – Dissanayake A, Drury P, Scott R, Young S; *Peru* – Arbañil H, Corigliano S, Gonzales L, Luna A, More L; *Poland* – Biniszkiwicz T, Kuleta J, Mader P, Stepień Z; *South Africa* – Boyd W, Burgess L, Ellis G, Makan H; *United Kingdom* – Atkin S, Calvert J, Hall T, McKinnon C; *United States* – Bonabi G, Brandon D, Caos A, Chappel C, Corder C, Fidelholtz J, Fitz-Patrick D, Glenn S, Hassman M, Hurley D, Jones C, Kipnes M, Koppel W, Krasner J, Lakin G, Landgarten S, LaTorre A, Liljenquist J, Lindley M, Lipetz R, Littlejohn T, Long W, Lowder C, Lucas J, Mark G, Marple R, Mayeda S, Mihayli D, Morin D, Norwood P, Oates S, Phillips F, Popeil L, Pratley R, Pudi K, Reed J, Rendell M, Reusch J, Riff D, Rock K, Rosenstock J, Sall K, Seidner M, Shaw T, Soboeiro M, Sparks J, Stanton D, Stegemoller R, Sugimoto D, Taber L, Tamayo R, Tarshis G, Touger MS, Wahle J, Weinstein R, Wilker J.

**Note:** Twelve sites enrolled no patients and therefore are not included in this list.
